# Supplementary material
Source: Atypon-hosted journal article supplement (doi:10.1287/opre.2023.0060)

Figure 5a: tSSA vs. mSSA

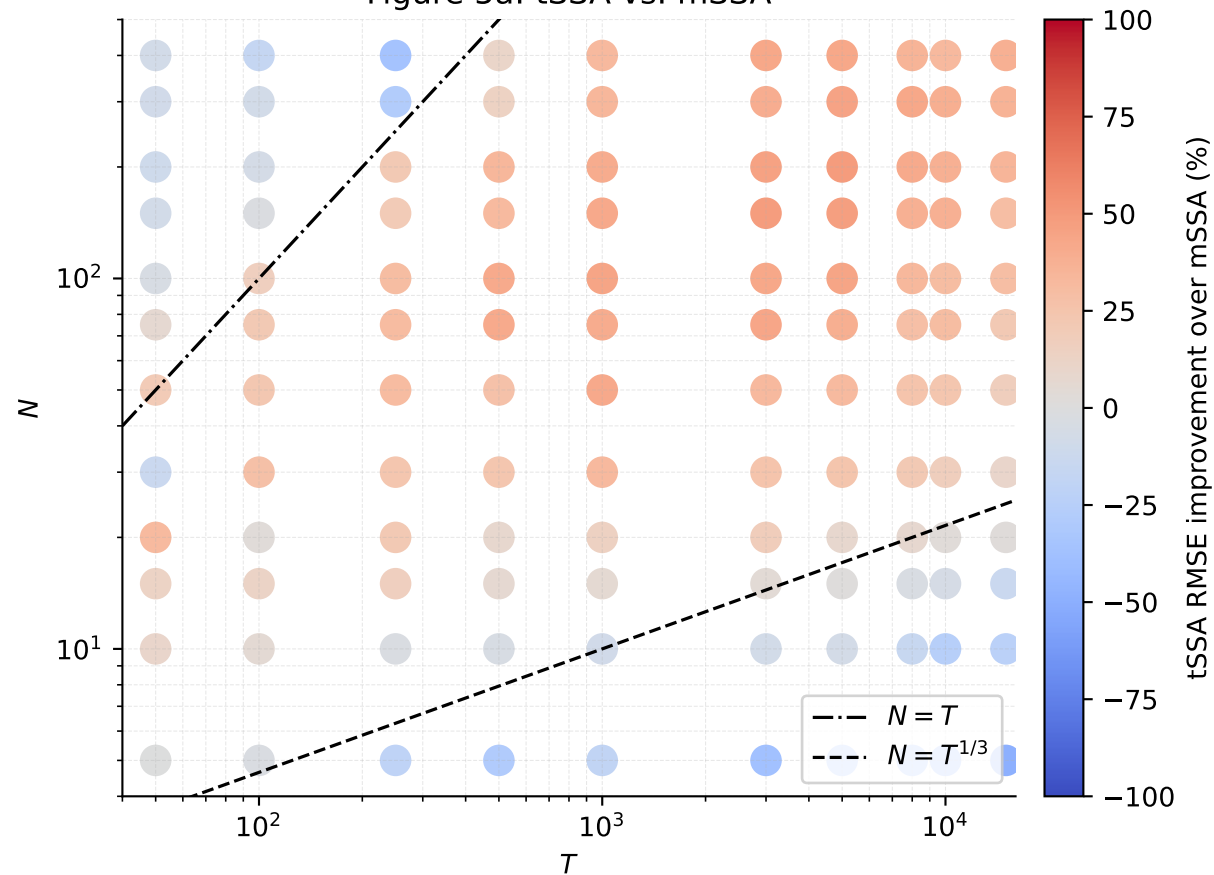

Supplement: opre.2023.0060.cd.zip [file figure_5a_tssa.pdf › code/mSSA_tssa_exp/results/figure_5a_tssa.pdf]

Figure 5b: ME vs. mSSA

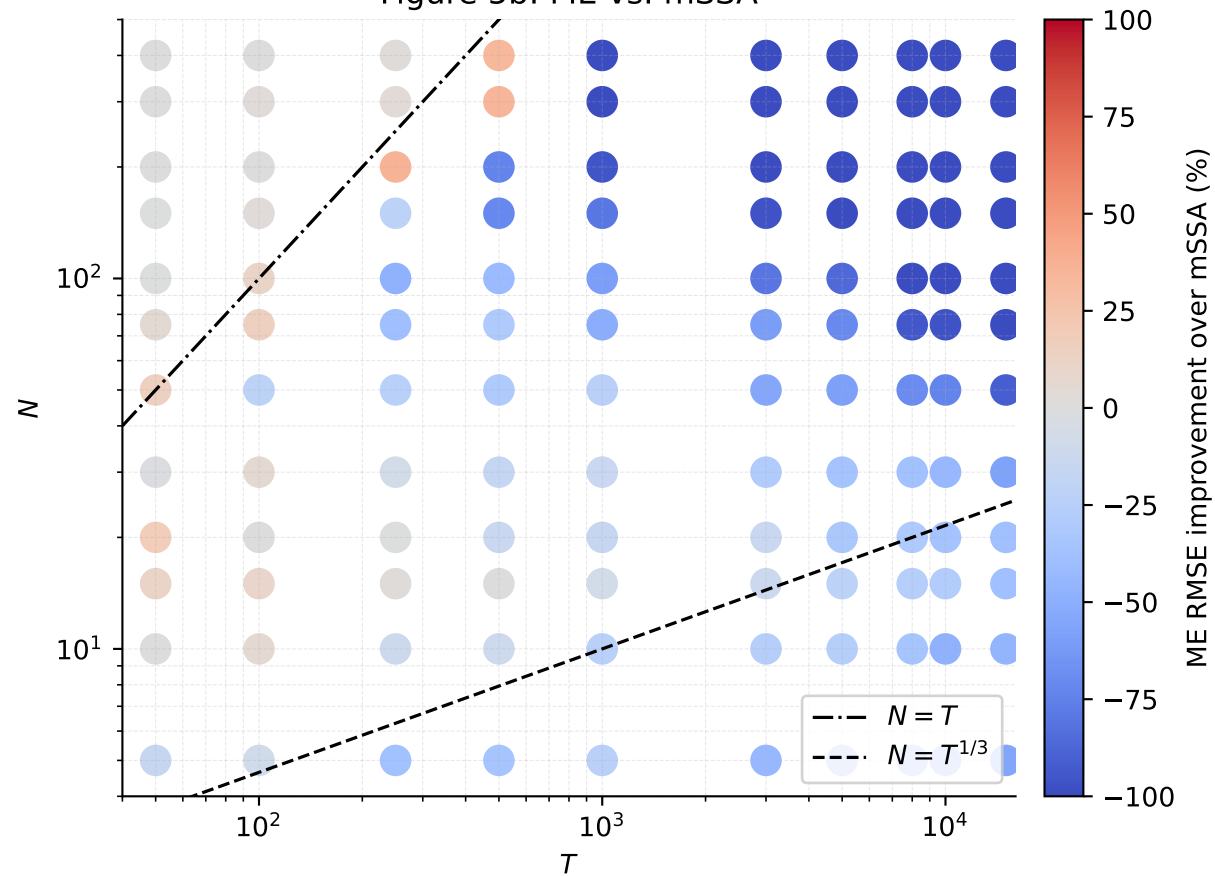

Supplement: opre.2023.0060.cd.zip [file figure_5b_me.pdf › code/mSSA_tssa_exp/results/figure_5b_me.pdf]
